# Supplementary material for: Handgrip strength and the risk of major depressive disorder: a two-sample Mendelian randomisation study
Source: HighWire-hosted journal article supplement (doi:10.1136/gpsych-2022-100807), 2022-09-27
Supplement: gpsych-2022-100807supp003_data_supplement.pdf [file gpsych-2022-100807supp003_data_supplement.pdf]

Table S2. Calculation of F-statistic.

$$F = \frac{N - k - 1}{k} \frac{R^2}{1 - R^2}$$

Left HGS: F-statistic = 1122.09

Right HGS: F-statistic = 1005.31

N: Sample size

k: The number of instrumental variants

R^2: The proportion of variance in the risk factor explained by the IVs
