# Supplementary material for: Handgrip strength and the risk of major depressive disorder: a two-sample Mendelian randomisation study
Source: HighWire-hosted journal article supplement (doi:10.1136/gpsych-2022-100807), 2022-09-27
Supplement: gpsych-2022-100807supp005_data_supplement.pdf [file gpsych-2022-100807supp005_data_supplement.pdf]

Table S4. Heterogeneity test for Mendelian Randomization

|       | Method                    | Q     | Q_df | Q_pval   |
|-------|---------------------------|-------|------|----------|
| Left  | MR Egger                  | 221.8 | 127  | 3.93E-07 |
|       | Inverse variance weighted | 222.7 | 128  | 4.37E-07 |
| Right | MR Egger                  | 259.5 | 142  | 6.62E-09 |
|       | Inverse variance weighted | 259.8 | 143  | 8.33E-09 |
